# Supplementary material for: Synthesis and Characterization of Functionalized Chitosan Nanoparticles with Pyrimidine Derivative for Enhancing Ion Sorption and Application for Removal of Contaminants
Source: MDPI journal article supplement (doi:10.3390/ma15134676), 2022-07-03
Supplement: s1 [file s1]

## Article

# Synthesis and Characterization of Functionalized Chitosan Nanoparticles with Pyrimidine Derivative for Enhancing Ion Sorption and Application for Removal of Contaminants

Mohammed F. Hamza <sup>1,2,\*</sup>, Yuezhou Wei <sup>1,3,\*</sup>, Khalid Althumayri <sup>4</sup>, Amr Fouda <sup>5</sup> and Nora A. Hamad <sup>6</sup>

<sup>1</sup> School of Nuclear Science and Technology, University of South China, Hengyang 421001, China; m\_fouda21@hotmail.com (M.F.H.); yzwei@sjtu.edu.cn (Y.W.)

<sup>2</sup> Nuclear Materials Authority, POB 530, El-Maadi, Cairo 11728, Egypt; m\_fouda21@hotmail.com (M.F.H.); hamedmira@yahoo.com (H.I.M.)

<sup>3</sup> School of Nuclear Science and Engineering, Shanghai Jiao Tong University, Shanghai 200240, China; yzwei@sjtu.edu.cn

<sup>4</sup> Department of Chemistry, College of Science, Taibah University, 30002 Al-Madinah Al-Munawarah, Saudi Arabia; Kthumairi@taibahu.edu.sa

<sup>5</sup> Botany and Microbiology Department, Faculty of Science, Al-Azhar University, Nasr City, Cairo 11884, Egypt; amr\_fh83@azhar.edu.eg

<sup>6</sup> Chemistry Department, Faculty of Science, Menofia University, Shebin El-Kom 32511, Egypt; nhamad059@gmail.com

\* Correspondence: m\_fouda21@hotmail.com (M.F.H.); yzwei@sjtu.edu.cn (Y.W.); Tel.: +20-111-668-1228 (M.F.H.); +86-771-322-4990 (Y.W.)

**Citation:** Hamza, M.F.; Wei, Y.; Althumayri, K.; Fouda, A.; Hamad, N.A. Synthesis and Characterization of Functionalized Chitosan Nanoparticles with Pyrimidine Derivative for Enhancing Ion Sorption and Application for Removal of Contaminants. *Materials* **2022**, *15*, 4676. <https://doi.org/10.3390/ma15134676>

Academic Editors: Alexander Yu Churyumov and Federico Mazzucato

Received: 21 May 2022

Accepted: 30 June 2022

Published: 3 July 2022

**Publisher's Note:** MDPI stays neutral with regard to jurisdictional claims in published maps and institutional affiliations.

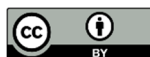

**Copyright:** © 2022 by the authors. Licensee MDPI, Basel, Switzerland. This article is an open access article distributed under the terms and conditions of the Creative Commons Attribution (CC BY) license (<https://creativecommons.org/licenses/by/4.0/>).

**Table S1a.** Modeling of uptake kinetics [1–3].

| Model | Equation                                                                                                                                                                                                                                                                                | Parameters                                                                                                                                               | Ref. |
|-------|-----------------------------------------------------------------------------------------------------------------------------------------------------------------------------------------------------------------------------------------------------------------------------------------|----------------------------------------------------------------------------------------------------------------------------------------------------------|------|
| PFORE | $q(t) = q_{eq,1}(1 - e^{-k_1 t})$                                                                                                                                                                                                                                                       | $q_{eq,2}$ (mmol g <sup>-1</sup> ): sorption capacity at equilibrium<br>$k_1$ (min <sup>-1</sup> ): apparent rate constant of PFORE                      | [2]  |
| PSORE | $q(t) = \frac{q_{eq,2}^2 k_2 t}{1 + k_2 q_{eq,2} t}$                                                                                                                                                                                                                                    | $q_{eq,2}$ (mmol g <sup>-1</sup> ): sorption capacity at equilibrium<br>$k_2$ (g mmol <sup>-1</sup> min <sup>-1</sup> ): apparent rate constant of PSORE | [2]  |
| RIDE  | $\frac{q(t)}{q_{eq}} = 1 - \sum_{n=1}^{\infty} \frac{6\alpha(\alpha+1)\exp\left(\frac{-D_e q_n^2}{r^2} t\right)}{9 + 9\alpha + q_n^2 \alpha^2}$<br>With $q_n$ being the non-zero roots of<br>$\tan q_n = \frac{3 q_n}{3 + \alpha q_n^2}$ and $\frac{m q}{V C_0} = \frac{1}{1 + \alpha}$ | $D_e$ (m <sup>2</sup> min <sup>-1</sup> ): Effective diffusivity coefficient                                                                             | [1]  |

(m (g): mass of sorbent; V (L): volume of solution;  $C_0$  (mmol L<sup>-1</sup>): initial concentration of the solution).

**Table S1b.** Modeling of sorption isotherms [4,5].

| Model      | Equation                                                             | Parameters                                                                                                                             | Ref. |
|------------|----------------------------------------------------------------------|----------------------------------------------------------------------------------------------------------------------------------------|------|
| Langmuir   | $q_{eq} = \frac{q_{m,L} C_{eq}}{1 + b_L C_{eq}}$                     | $q_{m,L}$ (mmol g <sup>-1</sup> ): Sorption capacity at saturation of monolayer<br>$b_L$ (L mmol <sup>-1</sup> ): Affinity coefficient | [5]  |
| Freundlich | $q_{eq} = k_F C_{eq}^{1/n_F}$                                        | $k_F$ and $n_F$ : empirical parameters of Freundlich equation                                                                          | [4]  |
| Sips       | $q_{eq} = \frac{q_{m,S} b_S C_{eq}^{1/n_S}}{1 + b_S C_{eq}^{1/n_S}}$ | $q_{m,L}$ , $b_S$ and $n_S$ : empirical parameters of Sips equation (based on Langmuir and Freundlich equations)                       | [5]  |

Akaike Information Criterion, AIC:

$$AIC = N \ln \left( \frac{\sum_{i=0}^N (y_{i,exp.} - y_{i,model})^2}{N} \right) + 2N_p + \frac{2N_p(N_p + 1)}{N - N_p - 1}$$

Where N is the number of experimental points,  $N_p$  the number of model parameters,  $y_{i,exp.}$  and  $y_{i,model}$  the experimental and calculated values of the tested variable.

**Table S2.** Cost evaluations of 10 g MC-TDP sorbent for treatment of Cr(VI) ions.

| Chemicals used                                 | Available units and prices |              | Units/prices for 10 g sorbent |              |
|------------------------------------------------|----------------------------|--------------|-------------------------------|--------------|
|                                                | Unit                       | Price (Euro) | Unit                          | Price (Euro) |
| Synthesis of TDP                               |                            |              |                               |              |
| Diethyl malonate                               | 500 g                      | 49           | 3.75 g                        | 0.367        |
| Thiourea                                       | 1000 g                     | 121          | 1.5 g                         | 0.1815       |
| Sodium ethoxide                                | 500 g                      | 74           | 50 g                          | 7.4          |
| Synthesis of magnetite                         |                            |              |                               |              |
| Ferrous sulfate                                | 250 g                      | 30           | 4.166 g                       | 0.4999       |
| ammonium ferric (III) sulfate<br>dodecahydrate | 500 g                      | 61           | 6.125 g                       | 0.747        |
| acetic acid                                    | 1000 mL                    | 27           | 9 mL                          | 0.243        |
| Synthesis of modified sorbent                  |                            |              |                               |              |
| Chitosan                                       | 50 g                       | 72           | 3 g                           | 4.32         |
| EPI                                            | 1000 mL                    | 60           | 17 mL                         | 1.02         |
| Ethanol                                        | 2500 mL                    | 61           | 50 mL                         | 1.22         |
| DMF                                            | 2500 mL                    | 51           | 140 mL                        | 2.856        |
| Acetone                                        | 1000 mL                    | 21           | 30 mL                         | 0.63         |
| Overall prices for 10 g sorbent                |                            |              |                               | 19.4844 euro |

**Table S3.** FTIR characterization of thiourea, TDP, MC-TDP, after sorption and after five cycles of sorption desorption.

| Assignment                                    | Thiourea         | TDP        | MC-TDP     | MC-TDP+Cr  | Sorbent after 5 <sup>th</sup> cycles | Ref.          |
|-----------------------------------------------|------------------|------------|------------|------------|--------------------------------------|---------------|
| N-H and OH str.                               | 3375, 3291, 3170 | 3584, 3392 | 3443       | 3423       | 3398                                 | [6,7]         |
| C-H (aromatic str.)                           |                  | 3095       |            |            |                                      | [8]           |
| C-H (aliphatic str.)                          | 2915, 2850       | 2867       | 2912, 2816 | 2920, 2847 | 2918, 2872                           | [9,10]        |
| S-H str. of thiol group                       | 2673             | 2583       | 2583       |            | overlapped                           | [11]          |
| Multiple of bonded C-O                        |                  |            | 2046       |            | 2056                                 | [11]          |
| C=C aromatic str.                             |                  | 1705       |            |            |                                      | [11]          |
| C=O, C=N str. and N-H bend.                   | 1611             | 1659, 1554 | 1626, 1499 | 1633       | 1628                                 | [12-14]       |
| C-N str., C-H bend, and C-C str.              | 1467, 1410       | 1422       | 1410       |            | 1451                                 | [12,13,15-17] |
| Arom. (secondary amine)/ quaternary ammonium  |                  | 1338       | 1363       | 1380       | 1370                                 | [11]          |
| Tert. amine                                   |                  | 1271       | 1303       |            | 1314                                 | [11]          |
| OH bend (in-plane) and C-O str.,              |                  | 1243       | 1214       |            | 1235                                 | [7,18,19]     |
| N-C str. and NH <sub>2</sub> (rock.)          | 1078             | 1155       | 1097, 1060 | 1088       | 1130                                 | [12,18,20]    |
| C-O str bridge oxygen and C-O-C. str. (asymm) |                  |            |            |            | 1056                                 | [21]          |
| NH <sub>2</sub> rock.                         |                  |            | 1015       |            | 1025                                 | [12]          |
| Aromatic C-H bend (in-plane)                  |                  | 923        | 854        |            | 899                                  | [17,21]       |
| NH <sub>2</sub> +CO wag. (out-of-phase)       | 727              | 800        |            |            |                                      | [11,12]       |
| N-C-N in-plane (bend), and Fe-O               | 627              | 599        | 632        | 580        | 627                                  | [15,16,22,23] |
| O-H out-of-plane (bend.)                      |                  | 541        | 541        |            | 575                                  | [24,25]       |
| C-S str.                                      | 485              | 453        |            |            |                                      | [26,27]       |
| Polysulfide str.                              | 447              | 448        | 420        |            | 443                                  | [11]          |

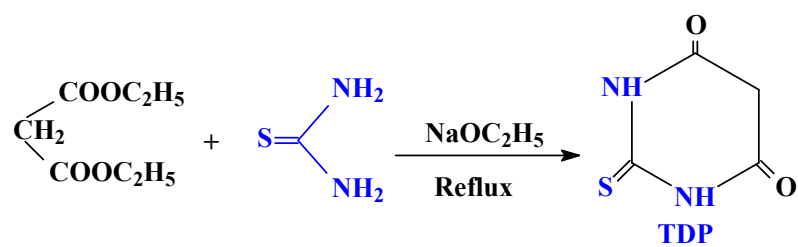

**Scheme S1.** Synthesis of 2-thioxodihydropyrimidine-4,6(1H,5H)-dione: TDP.

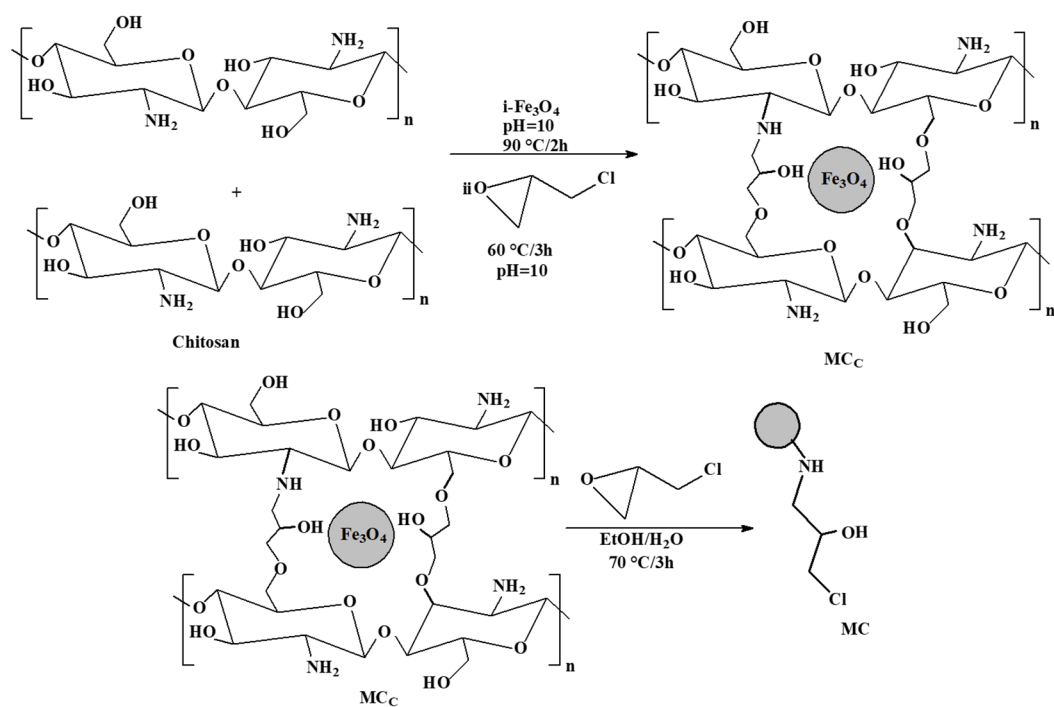

**Scheme S2.** synthesis of chitosan nanoparticles and activated chitosan (spacer arm).

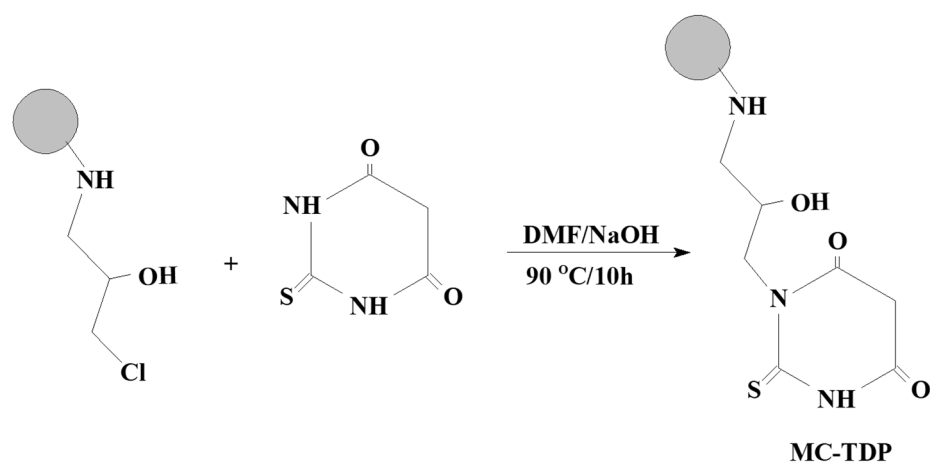

**Scheme S3.** Synthesis of grafted TDP chitosan nanoparticles.

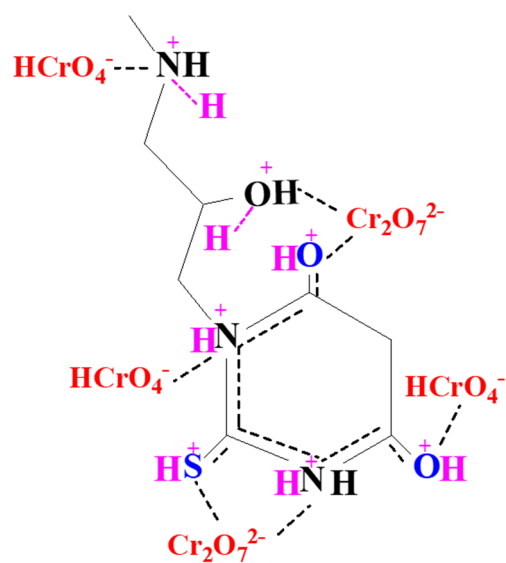

**Scheme S4.** Expected binding mechanism of chromate ions with MC-TDP sorbent at acidic pH medium.



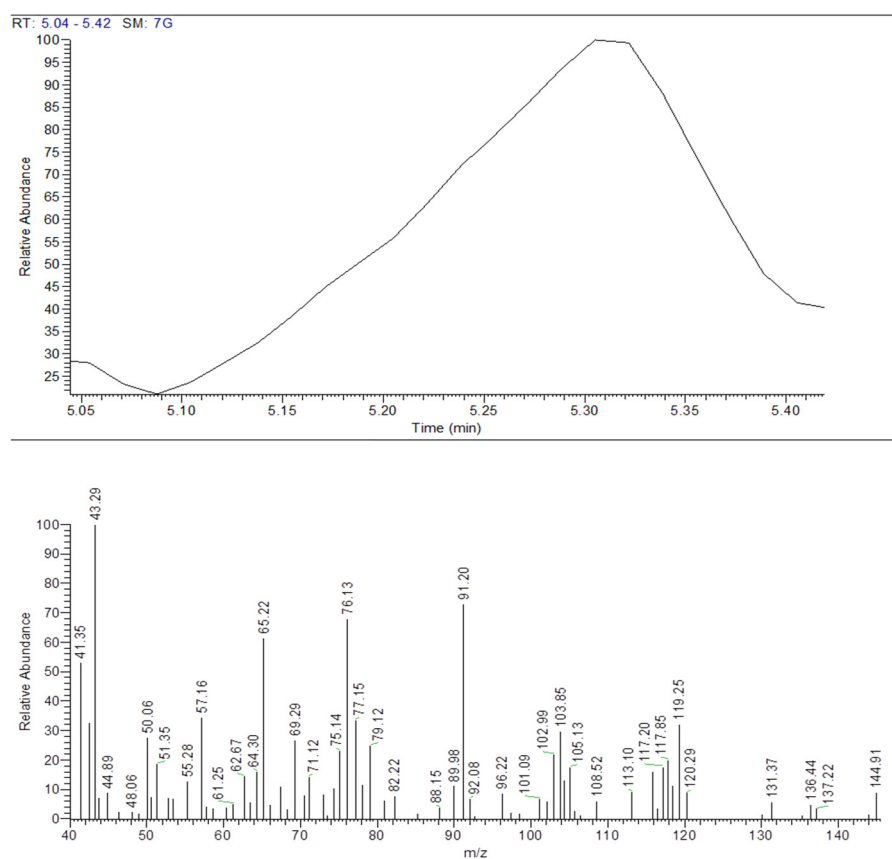

**Figure S1.** Completed data of the mass spectroscopy for the TDP moiety.

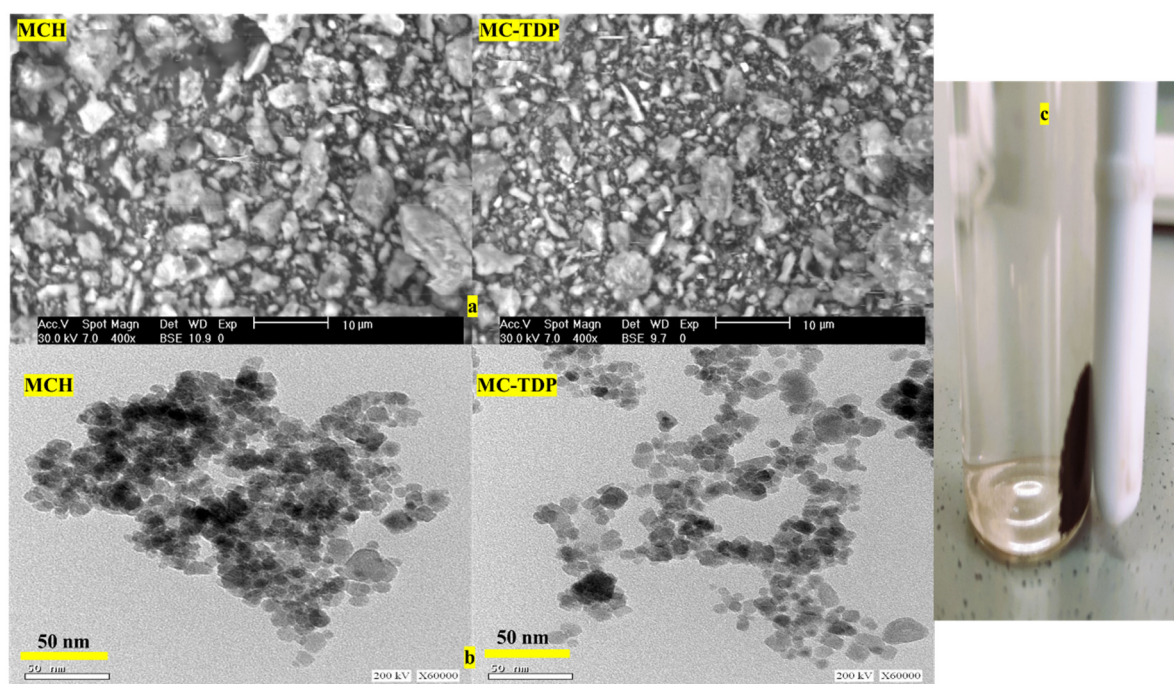

**Figure S2.** SEM (a) and TEM (b) graphs of MCH and MC-TDP sorbents and the effect of external magnet on the modified sorbent (c).

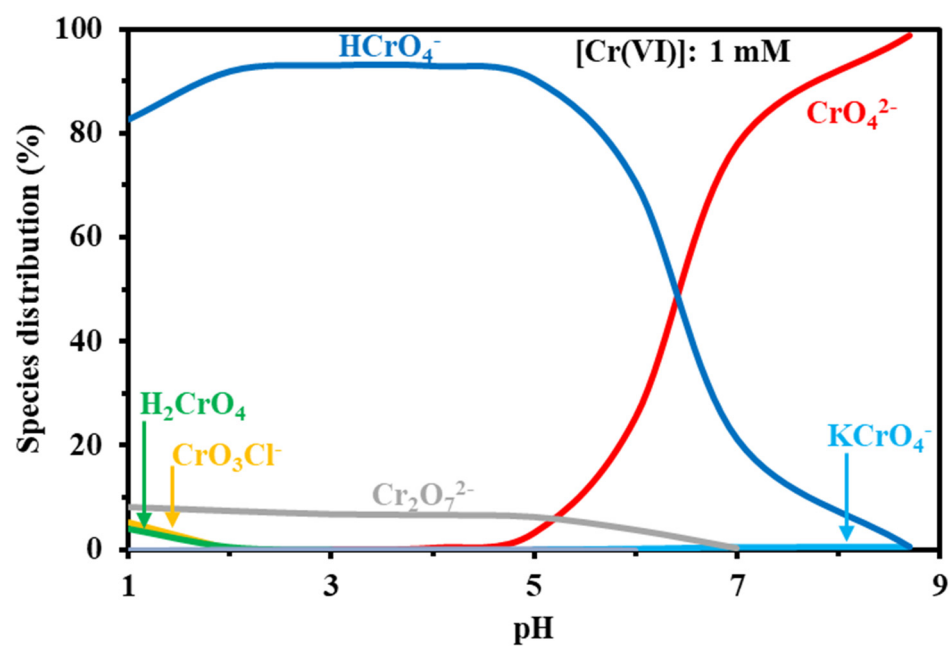

Figure S3. Cr(VI) species at pH 1-9.

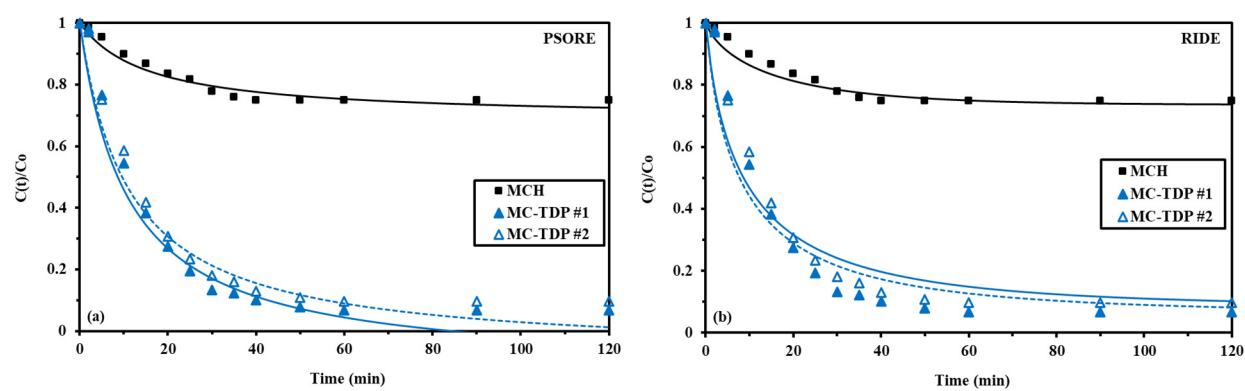

**Figure S4.** Unfitted uptake Cr(VI) kinetics on MCH, and MC-TDP Modeling with the PSORE (a) and RIDE (b).

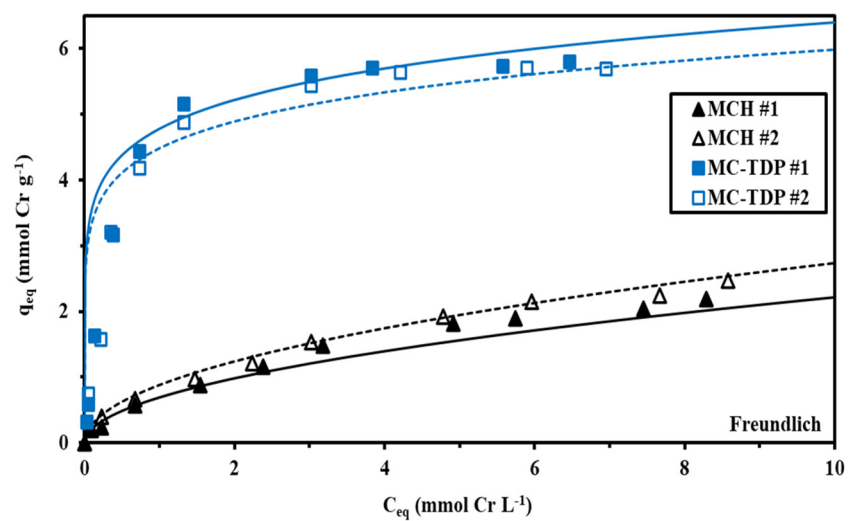

**Figure S5.** Freundlich modeling equations of sorption isotherms for Cr(VI) using MCH, MC-TDP.

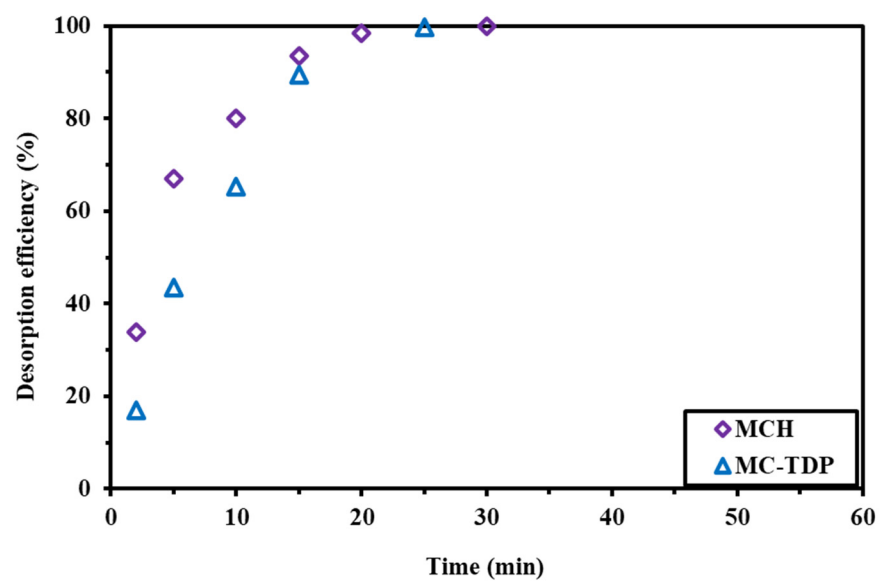

Figure S6. Desorption kinetics of MCH and MC-TDP sorbents.

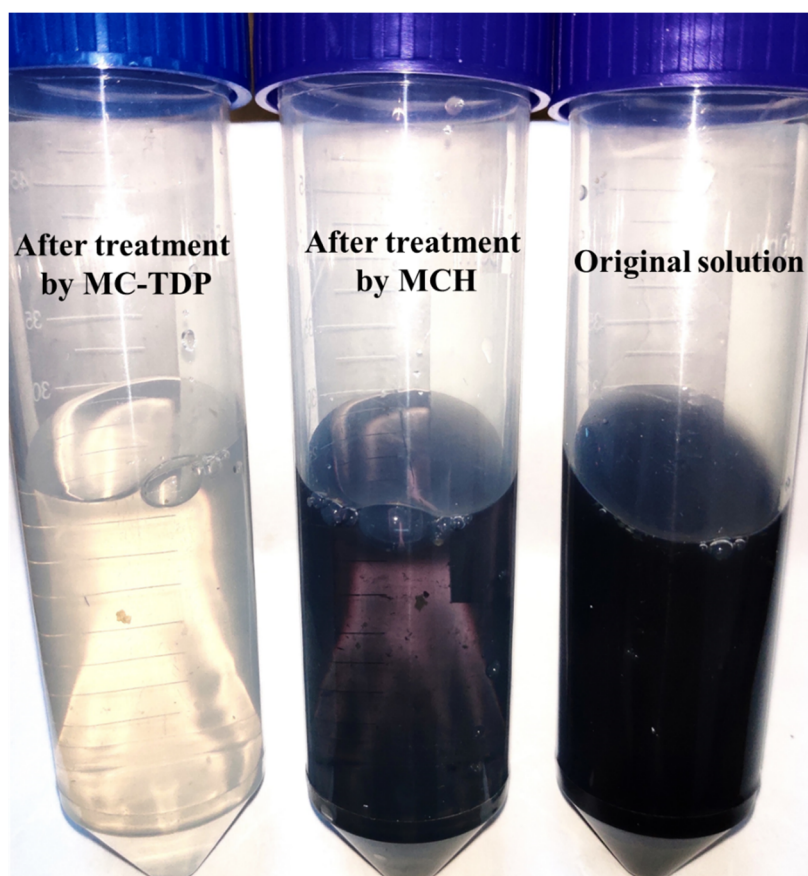

**Figure S7.** Removal efficient of Cr(VI) using MCH and MC-TDP.

## References

1. Crank, J. *The Mathematics of Diffusion*, 2nd. ed.; Oxford University Press: Oxford, U.K., 1975; p. 414.
2. Ho, Y.S.; McKay, G. Pseudo-second order model for sorption processes. *Process Biochem.* **1999**, *34*, 451-465, doi:10.1016/S0032-9592(98)00112-5.
3. Zhang, R.; Leiviska, T. Surface modification of pine bark with quaternary ammonium groups and its use for vanadium removal. *Chem. Eng. J.* **2020**, *385*, Art. N° 123967, doi:10.1016/j.cej.2019.123967.
4. Freundlich, H.M.F. Über die adsorption in lasungen. *Z. Phys. Chem.* **1906**, *57*, 385-470.
5. Tien, C. *Adsorption Calculations and Modeling*; Butterworth-Heinemann: Newton, MA, 1994 p. 243.
6. Hamza, M.F.; Abdel - Rahman, A.A.H.; Guibal, E. Magnetic glutamine - grafted polymer for the sorption of U (VI), Nd (III) and Dy (III). *Journal of Chemical Technology & Biotechnology* **2018**, *93*, 1790-1806.
7. Hamza, M.F. Uranium recovery from concentrated chloride solution produced from direct acid leaching of calcareous shale, Allouga ore materials, southwestern Sinai, Egypt. *Journal of Radioanalytical and Nuclear Chemistry* **2018**, *315*, 613-626.
8. Jin, W.; Shen, D.; Liu, Q.; Xiao, R. Evaluation of the co-pyrolysis of lignin with plastic polymers by TG-FTIR and Py-GC/MS. *Polymer degradation and stability* **2016**, *133*, 65-74.
9. Hamza, M.F.; Mahfouz, M.G.; Abdel-Rahman, A.A.-H. Adsorption of uranium (VI) ions on hydrazinyl amine and 1, 3, 4-thiadiazol-2 (3 H)-thion chelating resins. *Journal of dispersion science and technology* **2012**, *33*, 1544-1551.
10. Hamza, M.F.; Wei, Y.; Guibal, E. Quaternization of algal/PEI beads (a new sorbent): Characterization and application to scandium sorption from aqueous solutions. *Chemical Engineering Journal* **2020**, *383*, 123210.
11. Coates, J. Interpretation of Infrared Spectra, A Practical Approach. In *Encyclopedia of Analytical Chemistry* John Wiley & Sons, Ltd.: 2006; pp. 1-23.
12. Piasek, Z.; Urbanski, T. The infra-red absorption spectrum and structure of urea. *Bull. Acad. Pol. Sci.* **1962**, *X*, 113-120.
13. Manivannan, M.; Rajendran, S. Investigation of inhibitive action of urea-Zn<sup>2+</sup> system in the corrosion control of carbon steel in sea water. *Int. J. Environ. Sci. Technol.* **2011**, *3*, 8048-8060.
14. Wei, Y.; Salih, K.A.; Rabie, K.; Elwakeel, K.Z.; Zayed, Y.E.; Hamza, M.F.; Guibal, E. Development of phosphoryl-functionalized algal-PEI beads for the sorption of Nd (III) and Mo (VI) from aqueous solutions—Application for rare earth recovery from acid leachates. *Chemical Engineering Journal* **2021**, *412*, 127399.
15. Chandra, S.; Saleem, H.; Sundaraganesan, N.; Sebastian, S. Experimental and theoretical vibrational spectroscopic and HOMO, LUMO studies of 1,3-dimethylbarbituric acid. *Ind. J. Chem.* **2009**, *48A*, 1219-1227.
16. Corazzari, I.; Nistico, R.; Turci, F.; Faga, M.G.; Franzoso, F.; Tabasso, S.; Magnacca, G. Advanced physico-chemical characterization of chitosan by means of TGA coupled on-line with FTIR and GCMS: Thermal degradation and water adsorption capacity. *Polym. Degrad. Stabil.* **2015**, *112*, 1-9, doi:10.1016/j.polymdegradstab.2014.12.006.
17. Lawrie, G.; Keen, I.; Drew, B.; Chandler-Temple, A.; Rintoul, L.; Fredericks, P.; Grondahl, L. Interactions between alginate and chitosan biopolymers characterized using FTIR and XPS. *Biomacromolecules* **2007**, *8*, 2533-2541, doi:10.1021/bm070014y.



18. Yao, Z.; Zhang, C.; Ping, Q.; Yu, L.L. A series of novel chitosan derivatives: synthesis, characterization and micellar solubilization of paclitaxel. *Carbohydrate Polymers* **2007**, *68*, 781-792.
19. Wei, Y.; Salih, K.A.; Lu, S.; Hamza, M.F.; Fujita, T.; Vincent, T.; Guibal, E. Amidoxime functionalization of algal/polyethyleneimine beads for the sorption of Sr (II) from aqueous solutions. *Molecules* **2019**, *24*, 3893.
20. Tsai, H.S.; Wang, Y.Z.; Lin, J.J.; Lien, W.F. Preparation and properties of sulfopropyl chitosan derivatives with various sulfonation degree. *J. Appl. Polym. Sci.* **2010**, *116*, 1686-1693, doi:10.1002/app.31689.
21. Duarte, M.L.; Ferreira, M.C.; Marvao, M.R.; Rocha, J. An optimised method to determine the degree of acetylation of chitin and chitosan by FTIR spectroscopy. *Int. J. Biol. Macromol.* **2002**, *31*, 1-8, doi:10.1016/s0141-8130(02)00039-9.
22. Hamza, M.F.; Abdel-Rahman, A.A.-H.; Negm, A.S.; Hamad, D.M.; Khalafalla, M.S.; Fouda, A.; Wei, Y.; Amer, H.H.; Alotaibi, S.H.; Goda, A.E.-S. Grafting of Thiazole Derivative on Chitosan Magnetite Nanoparticles for Cadmium Removal—Application for Groundwater Treatment. *Polymers* **2022**, *14*, 1240.
23. Hamza, M.F.; Wei, Y.; Benettayeb, A.; Wang, X.; Guibal, E. Efficient removal of uranium, cadmium and mercury from aqueous solutions using grafted hydrazide-micro-magnetite chitosan derivative. *Journal of Materials Science* **2020**, *55*, 4193-4212.
24. Wei, Y.; Salih, K.A.; Hamza, M.F.; Fujita, T.; Rodríguez-Castellón, E.; Guibal, E. Synthesis of a New Phosphonate-Based Sorbent and Characterization of Its Interactions with Lanthanum (III) and Terbium (III). *Polymers* **2021**, *13*, 1513.
25. Wei, Y.; Rakhatkyzy, M.; Salih, K.A.; Wang, K.; Hamza, M.F.; Guibal, E. Controlled bi-functionalization of silica microbeads through grafting of amidoxime/methacrylic acid for Sr (II) enhanced sorption. *Chemical Engineering Journal* **2020**, *402*, 125220.
26. Caetano, C.S.; Caiado, M.; Farinha, J.; Fonseca, I.M.; Ramos, A.M.; Vital, J.; Castanheiro, J.E. Esterification of free fatty acids over chitosan with sulfonic acid groups. *Chem. Eng. J.* **2013**, *230*, 567-572, doi:10.1016/j.cej.2013.06.050.
27. Xiang, Y.; Yang, M.; Guo, Z.B.; Cui, Z. Alternatively chitosan sulfate blending membrane as methanol-blocking polymer electrolyte membrane for direct methanol fuel cell. *J. Membr. Sci.* **2009**, *337*, 318-323, doi:10.1016/j.memsci.2009.04.006.
